# Supplementary material
Source: PubMed Central journal article supplement (PMC3323021)

## SUPPLEMENTARY INFORMATION

**Supplementary Figure 1.** Typical amyloid formation kinetics following addition of 1 mg tissue equivalent per well of P4 fraction recovered from R6/2 mice (A, B), N171-82Q mice (C, D) and human HD samples (E, F). Full traces are shown for 2 separate tissues from each type. Sample identifiers (1 and 2) are the same as used in Figure 3b, 3d and 3f.

**Supplementary Figure 2.** Representative kinetics of amyloid formation in the presence of partially purified, misfolded htt obtained from YAC128 mice at 12 wk (A, B) and 7.4 wk (C, D) for 1 mg tissue equivalents per well. Data shown is for 2 separate tissues for both age time points. Sample identifiers (1 and 2) are the same as used in Figure 5e and 5f.

**Supplementary Figure 1**

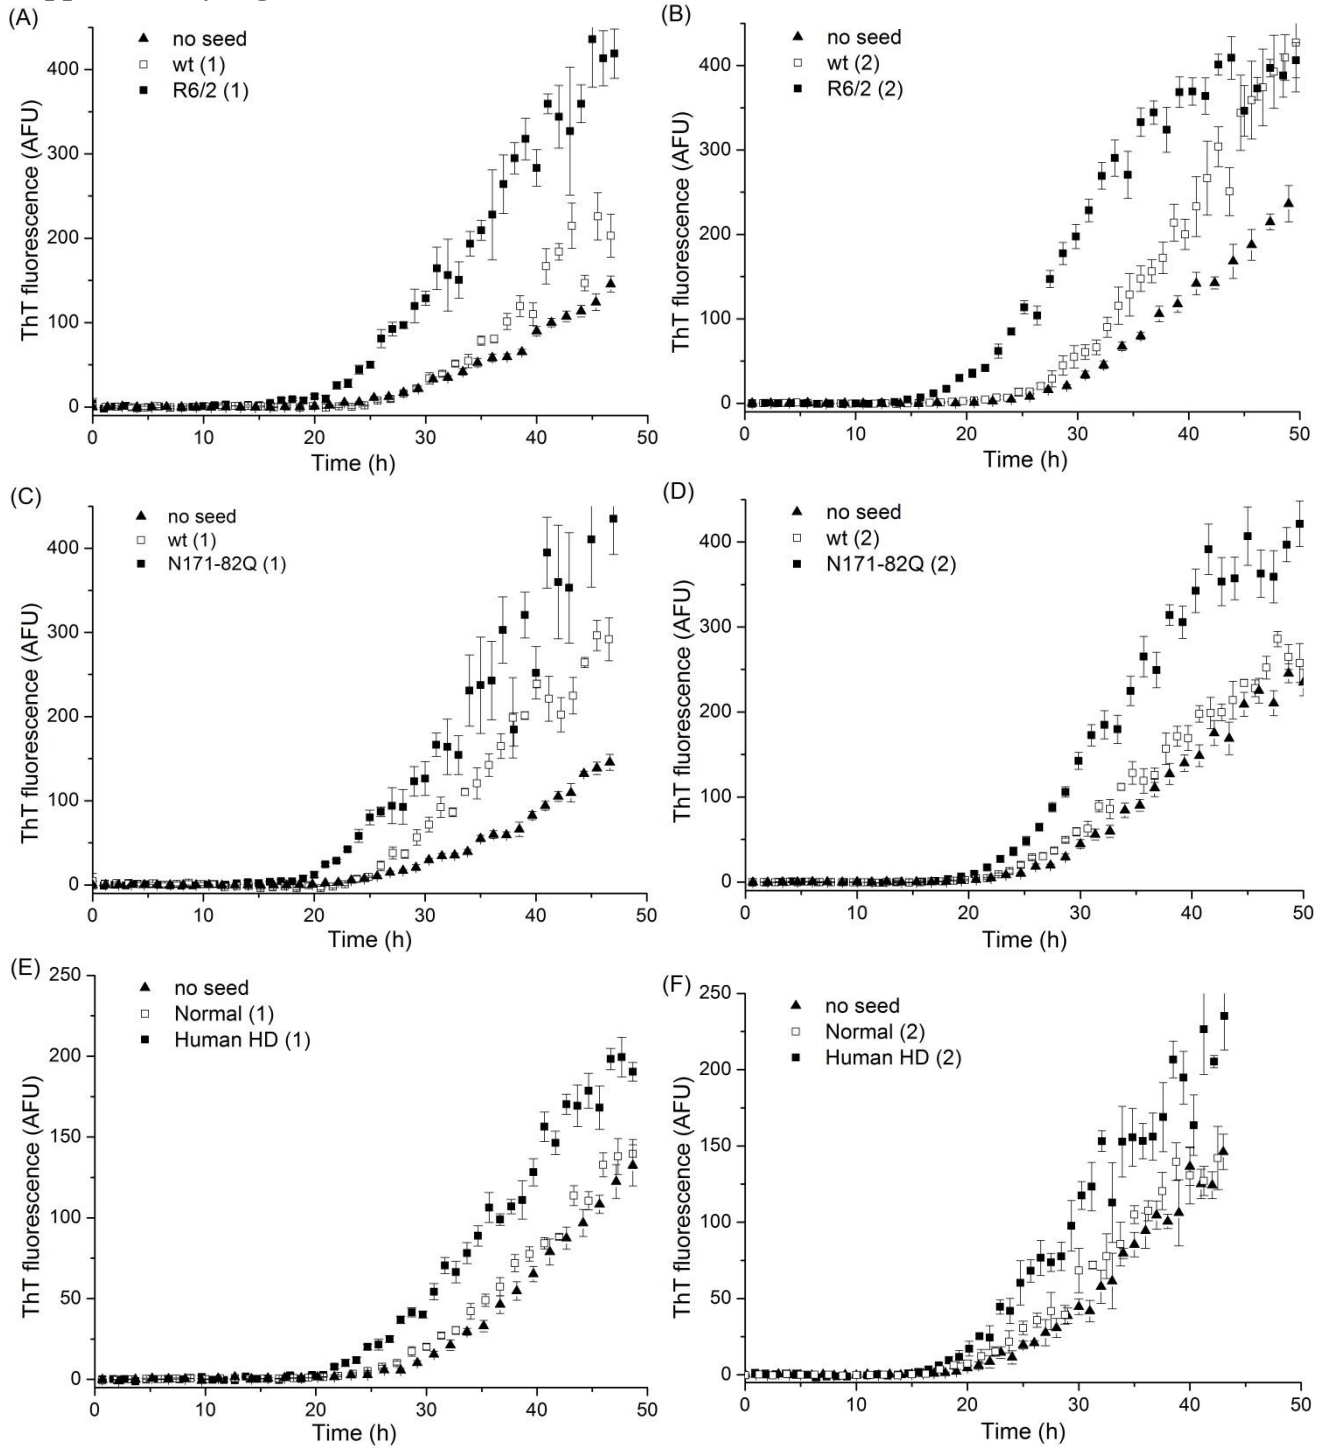

Supplementary Figure 2.

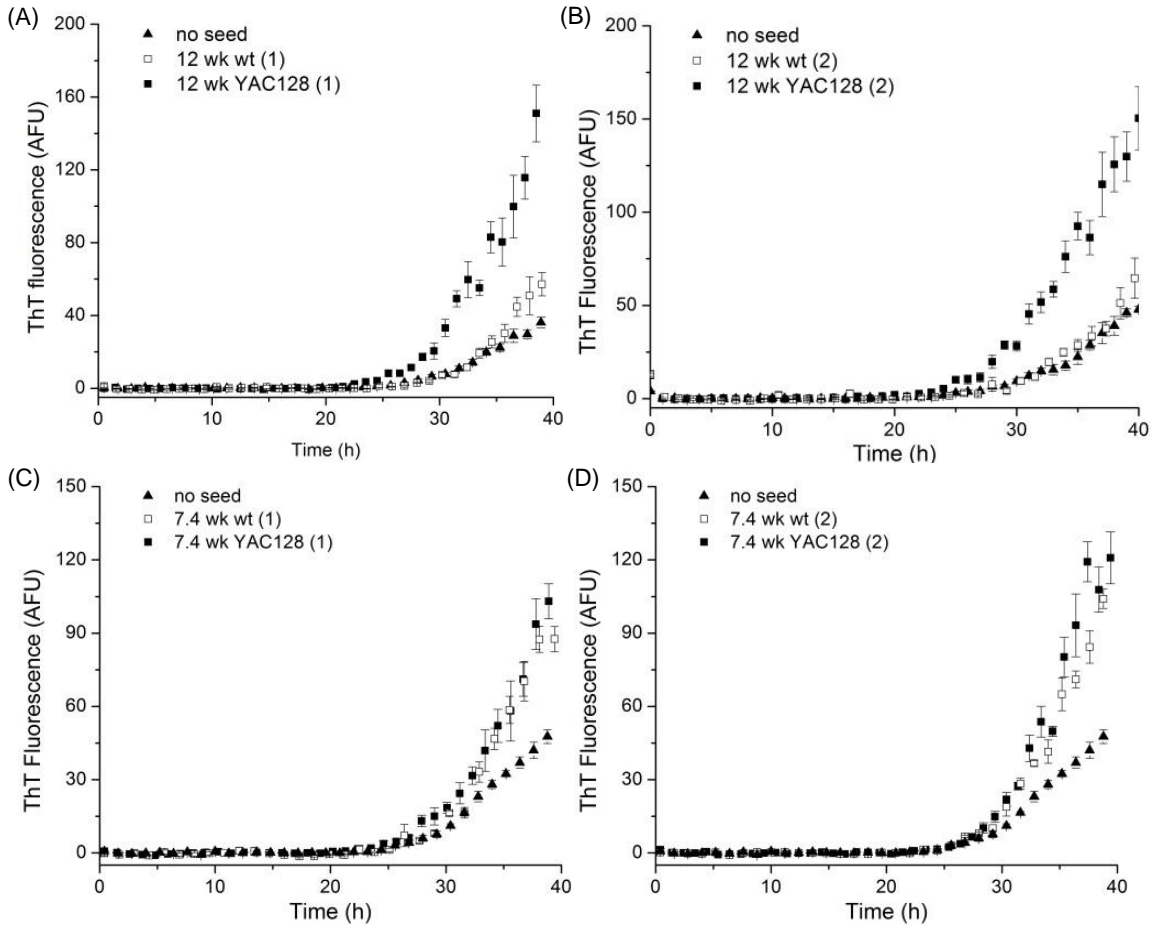

Supplement: supp_M111.305417_Suppl.pdf [file supp_M111.305417_Suppl.pdf]
